# Supplementary material for: Machine learning to predict pregnancy outcomes: a systematic review, synthesizing framework and future research agenda
Source: Springer Nature journal article supplement (doi:10.1186/s12884-022-04594-2), 2022-04-22
Supplement: MOESM1 [file 20392706]

## APPENDIX

Table A1: Types of data and features used

| Data Collection Approach | Sample Size | Type of Features                                                                                                             | Feature Examples                                                                           | Ref  |
|--------------------------|-------------|------------------------------------------------------------------------------------------------------------------------------|--------------------------------------------------------------------------------------------|------|
| Independently collected  | 4,236       | Demographic factors, maternal factors, obstetric characteristics                                                             | weight, height, body mass index (BMI), number of gestation weeks                           | [8]  |
|                          | 600         | Demographic factors, maternal factors, obstetric characteristics, medical and obstetric history                              | age, height, weight, BMI, parity, gestational diabetes                                     | [33] |
|                          | 1,124       | Demographic factors, obstetric characteristics, pregnancy termination attributes, medical and obstetric history              | age, parity, gestation week, failed pregnancy termination                                  | [47] |
|                          | 189         | Demographic factors, obstetric characteristics, behavioral parameters, current medical record, medical and obstetric history | age, hypertension, history of previous preterm delivery, presence of uterine irritability  | [54] |
|                          | 150         | Demographic factors, maternal factors, obstetric characteristics, current medical record                                     | age, BMI, type of birth, gestational age                                                   | [48] |
|                          | 450         | Demographic factors, maternal factors, obstetric characteristics, medical and obstetric history                              | age, height, BMI, number of fetuses, number of pregnancies, history of abortion            | [46] |
|                          | 25,689      | Demographic factors, obstetric characteristics                                                                               | age, gestational age, ethnicity                                                            | [49] |
|                          | 546         | Demographic factors, maternal factors, obstetric characteristics, behavioral parameters, current medical record              | gastrointestinal disease, BMI, previous birth, weight                                      | [53] |
|                          | 1,729       | Demographic factors, infertility characteristics                                                                             | age, infertility diagnosis, infertility factor, number of cleavages                        | [42] |
|                          | 31,030      | Maternal factors, obstetric characteristics, infertility characteristics                                                     | BMI, duration of infertility, embryo transferred count, embryo grade                       | [45] |
| Prospective cohort study | 11,855      | Demographic factors, maternal factors, obstetric characteristics, medical and obstetric history                              | gestational diabetes, previous vaginal delivery, ethnicity, BMI, estimated gestational age | [37] |
|                          | 910         | Demographic factors, maternal factors, obstetric characteristics, behavioral parameters, medical and obstetric history       | age, hypertension, parity, previous preterm birth                                          | [9]  |
|                          | 1,743       | Demographic factors, medical and obstetric history, ultrasound measurements                                                  | parity, cervical length, gestational age at delivery, ethnicity                            | [40] |
|                          | 100         | Demographic factors, maternal factors, ultrasound characteristics                                                            | age, Bishop score, initial weight, initial BMI                                             | [34] |
|                          | 1,054       | Maternal factors, demographic factors, obstetric characteristics                                                             | age, BMI, parity, duration of pregnancy, gestational diabetes                              | [43] |

|                            |         |                                                                                                                              |                                                                                                      |      |
|----------------------------|---------|------------------------------------------------------------------------------------------------------------------------------|------------------------------------------------------------------------------------------------------|------|
| Retrospective cohort study | 9,888   | Demographic factors, medical and obstetric history, obstetric characteristics, behavioral parameters, neonatal factors       | age, parity, gestational age, head circumferences                                                    | [36] |
|                            | 599     | Demographic factors, maternal factors, obstetric characteristics, medical and obstetric history, neonatal features           | age, BMI, prior vaginal delivery, gravity, parity, complications of pregnancy                        | [38] |
|                            | 10,295  | Demographic factors, maternal features, medical and obstetric history, neonatal features, obstetric characteristics          | age, BMI, birth weight, gravidity, parity, previous cesarean                                         | [39] |
|                            | 2,006   | Demographic factors, maternal factors, obstetric characteristics, medical and obstetric record, ultrasound measurements      | gestational age, parity, history of abortion, history of vaginal delivery, estimated birth weight    | [41] |
|                            | 7,188   | Demographic factors, maternal factors, obstetric characteristics, medical and obstetric history, infertility characteristics | previous miscarriage, previous abortion, BMI, duration of infertility                                | [55] |
|                            | 274     | Demographic factors, obstetric characteristics, medical and obstetric history                                                | miscarriages, previous preterm birth, multiple gestation, cervical length                            | [10] |
|                            | 313,238 | Demographic factors, maternal factors, obstetric characteristics, behavioral parameters                                      | age, height, smoking status, Apgar score, birth weight                                               | [52] |
| Case-control study         | 204     | Demographic factors, maternal factors, medical and obstetric history, obstetric characteristics                              | age, gestational age, inter delivery interval, prior successful vaginal birth after cesarean section | [35] |

Table A2: Categories of the features used in reviewed articles

| Categories                       | Feature Example                                                                                                                                                                                                                                                                                                                                                                                                                       |
|----------------------------------|---------------------------------------------------------------------------------------------------------------------------------------------------------------------------------------------------------------------------------------------------------------------------------------------------------------------------------------------------------------------------------------------------------------------------------------|
| Demographic factors              | age, education, ethnicity, occupation, religion, marital status                                                                                                                                                                                                                                                                                                                                                                       |
| Maternal factors                 | height, weight, BMI, weight on conceiving, BMI at delivery, BMI before pregnancy                                                                                                                                                                                                                                                                                                                                                      |
| Obstetric characteristics        | mode of delivery, sex of the baby, birth weight, bishop score, gestational age, hypertension, gastrointestinal disease, gestational diabetes, induction of labor, duration of pregnancy, uterine rupture, complications of pregnancy, complications of labor and delivery, induction of labor, low lying placenta, cervical dilatation, presence of meconium                                                                          |
| Medical and obstetric history    | pregnancy parity, gravidity, history of gestational diabetes, history of abortion, history of previous preterm delivery, previous vaginal delivery, previous preterm vaginal delivery, vaginal delivery after previous cesarean delivery, maximum birth weight of previous child, minimal gestational week in previous deliveries, previous ectopic pregnancies, prior uterine layer closure, previous cesarean, previous miscarriage |
| Medical history of relatives     | family history of preeclampsia, family history of gestational diabetes                                                                                                                                                                                                                                                                                                                                                                |
| Current medical record           | blood pressure, weight gain, number of physician visits, glucose level, allergies, medicines taken during pregnancy, blood type                                                                                                                                                                                                                                                                                                       |
| Pregnancy termination attributes | achieved pregnancy termination, failed pregnancy termination, incomplete pregnancy termination, contraceptive method                                                                                                                                                                                                                                                                                                                  |
| Behavioral parameters            | smoking, drugs, alcohol                                                                                                                                                                                                                                                                                                                                                                                                               |

|                             |                                                                                                                                                                                                                         |
|-----------------------------|-------------------------------------------------------------------------------------------------------------------------------------------------------------------------------------------------------------------------|
| Ultrasound measurements     | cervical length, fetal head-pubis symphysis distance, biparietal diameter, abdominal circumference, femur length, humerus length, head circumference                                                                    |
| Neonatal features           | neonatal mortality, 5-minute apgar test, post-partum hemorrhage, uterine rupture, macrosomia                                                                                                                            |
| Infertility characteristics | type of infertility, duration of infertility, infertility diagnosis, infertility factor, antral follicle counts, number of cleavages, frozen sperm, thyroid stimulating hormone, embryo transferred count, embryo Grade |

Table A3: Performance of the machine learning algorithms

| Algorithm                 | Reference | Performance                                                                          |
|---------------------------|-----------|--------------------------------------------------------------------------------------|
| Decision Tree             | [8]       | Accuracy = 83.91%,<br>Specificity = 80.05%,<br>Sensitivity = 88.28%                  |
|                           | [47]      | Sensitivity = 92.6%                                                                  |
|                           | [54]      | Accuracy = 89.95%,<br>Sensitivity = 97.69%,<br>Specificity = 72.88%                  |
| Naive Bayes               | [8]       | Accuracy = 74.69%,<br>Specificity = 62.98%,<br>Sensitivity = 84.29%                  |
|                           | [54]      | Accuracy = 77.78%,<br>Sensitivity = 90.00%,<br>Specificity = 50.85%                  |
| Generalized Linear Models | [8]       | Accuracy = 77.41%,<br>Specificity = 67.55%,<br>Sensitivity = 84.27%                  |
|                           | [47]      | Sensitivity = 92.9%                                                                  |
| Support Vector Machine    | [8]       | Accuracy = 62.06%,<br>Specificity = 27.92%,<br>Sensitivity = 85.57%                  |
|                           | [47]      | Sensitivity = 92.9%                                                                  |
|                           | [54]      | Accuracy = 74.07%,<br>Sensitivity = 98.46%,<br>Specificity = 20.34%                  |
|                           | [42]      | Accuracy = 98.01%,<br>F-score = 98.1%,<br>AUC = 99.3%                                |
|                           | [51]      | Accuracy = 86.11%,<br>Sensitivity = 86.11%,<br>Precision = 86.11%                    |
|                           | [50]      | Precision = 49.13%,<br>Sensitivity = 46.14%,<br>Specificity = 94.09%,<br>AUC = 63.2% |
| Gradient Boosting         | [36]      | AUC = 79.3%                                                                          |
|                           | [36]      | AUC = 75.6%                                                                          |
| Random Forest             | [54]      | Accuracy = 70.90%,<br>Sensitivity = 99.23%,<br>Specificity = 8.47%                   |
|                           | [10]      | Accuracy = 95%,<br>Sensitivity = 100%,<br>Specificity = 94%,<br>AUC = 98%            |
|                           | [42]      | Accuracy = 98.83%,<br>F-score = 98.8%,<br>AUC = 99.2%                                |
|                           | [50]      | Precision = 95.86%,<br>Sensitivity = 98.4%,<br>Specificity = 99.76%,<br>AUC = 99.9%  |
|                           | [36]      | AUC = 78.2 %                                                                         |
| Balanced Random Forest    | [36]      | AUC = 78.4 %                                                                         |
| AdaBoost Ensemble         | [36]      | AUC = 78.4 %                                                                         |
|                           | [33]      | Accuracy = 71.30%                                                                    |

|                                          |      |                                                                                            |
|------------------------------------------|------|--------------------------------------------------------------------------------------------|
|                                          | [42] | Accuracy = 93.21%,<br>F-score = 93.2%,<br>AUC = 96.6%                                      |
| Multivariate Analysis                    | [38] | AUC = 72.3 %                                                                               |
| Logistic Regression                      | [69] | AUC = 66 %                                                                                 |
|                                          | [54] | Accuracy = 74.07%,<br>Sensitivity = 92.31%,<br>Specificity = 33.90%                        |
|                                          | [51] | Accuracy = 87.23%,<br>Sensitivity = 98.75%,<br>Specificity = 21.43%,<br>Precision = 98.75% |
| Neural Network                           | [69] | AUC = 64%-68%                                                                              |
|                                          | [54] | Accuracy= 76.19%,<br>Sensitivity= 93.85%,<br>Specificity= 37.29%                           |
|                                          | [49] | AUC = 82.7%,<br>Sensitivity = 96.5%                                                        |
|                                          | [10] | Accuracy= 92%,<br>Sensitivity= 50%,<br>Specificity= 100%,<br>AUC= 76%                      |
| J48                                      | [44] | Accuracy=94.3%,<br>Sensitivity=93.8%,<br>Specificity=94.3%,<br>Area under ROC =94.8%       |
|                                          | [10] | Accuracy= 81%,<br>Sensitivity= 33%,<br>Specificity= 90%,<br>AUC= 63%                       |
| PART                                     | [44] | Accuracy = 84.3%                                                                           |
| XGBoost                                  | [55] | AUC = 73%                                                                                  |
| K Nearest Neighbor                       | [10] | Accuracy = 95%,<br>Sensitivity = 67%,<br>Specificity = 100%,<br>AUC = 98%                  |
|                                          | [50] | Precision = 34.91%,<br>Sensitivity= 92.68%,<br>Specificity= 99.28%,<br>AUC= 71.7%          |
| Multilayer Perceptron<br>Neural Networks | [42] | Accuracy = 97.77%,<br>F-score = 97.8%,<br>AUC = 99.1%                                      |
| Classification and Regression<br>Trees   | [42] | Accuracy = 95.24%,<br>F-score = 95.2%,<br>AUC = 97%                                        |
